# Supplementary material
Source: PubMed Central journal article supplement (PMC9490641)
Supplement: NIHMS1830635-supplement-1.pdf [file NIHMS1830635-supplement-1.pdf]

**Supplemental information**

**Multimomics assessment  
of dietary protein titration reveals  
altered hepatic glucose utilization**

**Michael R. MacArthur, Sarah J. Mitchell, Katia S. Chadaideh, J. Humberto Treviño-Villarreal, Jonathan Jung, Krystle C. Kalafut, Justin S. Reynolds, Charlotte G. Mann, Kaspar M. Trocha, Ming Tao, Tay-Zar Aye Cho, Anantawat Koontanatechanon, Vladimir Yeliseyev, Lynn Bry, Alban Longchamp, C. Keith Ozaki, Caroline A. Lewis, Rachel N. Carmody, and James R. Mitchell**

|                             | 18%   | 14%   | 10%   | 6%    | 2%    | 0%    |
|-----------------------------|-------|-------|-------|-------|-------|-------|
| Component                   | g/kg  | g/kg  | g/kg  | g/kg  | g/kg  | g/kg  |
| Research Diets D12450BSpx   | 405.3 | 405.3 | 405.3 | 405.3 | 405.3 | 405.3 |
| Casein                      | 89.0  | 69.2  | 49.4  | 29.7  | 9.9   | 0.0   |
| Sucrose                     | 0.0   | 19.8  | 39.5  | 59.3  | 79.1  | 89.0  |
| Cystine                     | 1.5   | 1.5   | 1.5   | 1.5   | 1.5   | 1.5   |
| Agar                        | 9.9   | 9.9   | 9.9   | 9.9   | 9.9   | 9.9   |
| Water                       | 494.3 | 494.3 | 494.3 | 494.3 | 494.3 | 494.3 |
|                             |       |       |       |       |       |       |
| Kcal/g                      | 1.95  | 1.95  | 1.95  | 1.95  | 1.95  | 1.95  |
|                             |       |       |       |       |       |       |
| Percent energy protein      | 18    | 14    | 10    | 6     | 2     | 0     |
| Percent energy carbohydrate | 72    | 76    | 80    | 84    | 88    | 90    |
| Percent energy fat          | 10    | 10    | 10    | 10    | 10    | 10    |

Supplemental table 1, related to Figure 1. Compositions of experimental diets.

|                  | <b>pct00<br/>(N=6)</b> | <b>pct06<br/>(N=5)</b> | <b>pct18<br/>(N=6)</b> | <b>P-value</b> |
|------------------|------------------------|------------------------|------------------------|----------------|
| <b>C Peptide</b> |                        |                        |                        |                |
| Mean (SD)        | 240 (± 190)            | 1500 (± 460)           | 3400 (± 720)           | <0.001         |
| <b>Ghrelin</b>   |                        |                        |                        |                |
| Mean (SD)        | 35 (± 2.9)             | 33 (± 2.5)             | 35 (± 3.2)             | 0.427          |
| <b>GIP</b>       |                        |                        |                        |                |
| Mean (SD)        | 410 (± 130)            | 600 (± 220)            | 580 (± 170)            | 0.177          |
| <b>GLP1</b>      |                        |                        |                        |                |
| Mean (SD)        | 44 (± 4.0)             | 47 (± 8.8)             | 48 (± 8.5)             | 0.625          |
| <b>IL6</b>       |                        |                        |                        |                |
| Mean (SD)        | 26 (± 2.5)             | 29 (± 4.1)             | 28 (± 3.9)             | 0.378          |
| <b>Glucagon</b>  |                        |                        |                        |                |
| Mean (SD)        | 96 (± 13)              | 98 (± 16)              | 110 (± 22)             | 0.224          |
| <b>Leptin</b>    |                        |                        |                        |                |
| Mean (SD)        | 15000 (± 2900)         | 20000 (± 1100)         | 21000 (± 880)          | <0.001         |
| <b>MCP1</b>      |                        |                        |                        |                |
| Mean (SD)        | 37 (± 9.0)             | 38 (± 7.1)             | 42 (± 7.6)             | 0.601          |
| <b>PP</b>        |                        |                        |                        |                |
| Mean (SD)        | 75 (± 3.8)             | 70 (± 6.4)             | 76 (± 11)              | 0.398          |
| <b>PYY</b>       |                        |                        |                        |                |
| Mean (SD)        | 160 (± 18)             | 170 (± 26)             | 210 (± 35)             | 0.0196         |
| <b>TNF</b>       |                        |                        |                        |                |
| Mean (SD)        | 26 (± 3.7)             | 27 (± 3.4)             | 28 (± 3.4)             | 0.449          |
| <b>Amylin</b>    |                        |                        |                        |                |
| Mean (SD)        | 43 (± 5.2)             | 48 (± 3.7)             | 53 (± 8.9)             | 0.0586         |

Supplemental table 2, related to Figure 2: Serum Luminex parameter values of conventional donor mice in pg/mL with ANOVA omnibus P-value.

|                  | pct00<br>(N=8) | pct06<br>(N=8) | pct18<br>(N=8) | P-value |
|------------------|----------------|----------------|----------------|---------|
| <b>C Peptide</b> |                |                |                |         |
| Mean (SD)        | 930 (± 330)    | 660 (± 250)    | 690 (± 210)    | 0.112   |
| <b>Ghrelin</b>   |                |                |                |         |
| Mean (SD)        | 21 (± 4.9)     | 18 (± 1.1)     | 19 (± 6.0)     | 0.371   |
| <b>GIP</b>       |                |                |                |         |
| Mean (SD)        | 400 (± 190)    | 360 (± 120)    | 420 (± 140)    | 0.736   |
| <b>GLP1</b>      |                |                |                |         |
| Mean (SD)        | 43 (± 11)      | 38 (± 4.1)     | 36 (± 7.9)     | 0.195   |
| <b>IL6</b>       |                |                |                |         |
| Mean (SD)        | 38 (± 30)      | 30 (± 7.0)     | 26 (± 8.1)     | 0.414   |
| <b>Glucagon</b>  |                |                |                |         |
| Mean (SD)        | 63 (± 20)      | 49 (± 8.8)     | 43 (± 9.8)     | 0.0222  |
| <b>Leptin</b>    |                |                |                |         |
| Mean (SD)        | 6900 (± 2600)  | 4900 (± 2000)  | 4100 (± 1700)  | 0.0443  |
| <b>MCP1</b>      |                |                |                |         |
| Mean (SD)        | 48 (± 20)      | 40 (± 7.7)     | 39 (± 13)      | 0.435   |
| <b>PP</b>        |                |                |                |         |
| Mean (SD)        | 49 (± 12)      | 41 (± 6.1)     | 42 (± 8.6)     | 0.232   |
| <b>PYY</b>       |                |                |                |         |
| Mean (SD)        | 110 (± 52)     | 79 (± 27)      | 67 (± 14)      | 0.0409  |
| <b>TNF</b>       |                |                |                |         |
| Mean (SD)        | 35 (± 5.4)     | 34 (± 8.5)     | 32 (± 10)      | 0.693   |
| <b>Amylin</b>    |                |                |                |         |
| Mean (SD)        | 50 (± 15)      | 52 (± 7.8)     | 52 (± 15)      | 0.959   |

Supplemental table 3, related to Figure 2: Serum Luminex parameter values of gnotobiotic recipient mice in pg/mL with ANOVA omnibus P-value.

| REAGENT or RESOURCE                                          | SOURCE                    | IDENTIFIER |
|--------------------------------------------------------------|---------------------------|------------|
| Mouse <i>Atf4</i> flox genotyping F:<br>GCAGACGTTCTGGGTTAGA  | (Ebert, Dyle et al. 2012) | N/A        |
| Mouse <i>Atf4</i> flox genotyping R:<br>GCTTCCTGCCTACATTGCTC | (Ebert, Dyle et al. 2012) | N/A        |
| Mouse universal Cre genotyping F:<br>GCCAGCTAAACATGCTTCATC   | This paper                | N/A        |
| Mouse universal Cre genotyping R:<br>ATTGCCCTGTTTCACTATCC    | This paper                | N/A        |
| Mouse Cre control genotyping F:<br>TTACGTCCATCGTGGACAGC      | This paper                | N/A        |
| Mouse Cre control genotyping R:<br>TGGGCTGGGTGTTAGCCTTA      | This paper                | N/A        |

Supplemental table 4, related to Key Resource Table: Genotyping primers for mouse strains used in this paper.

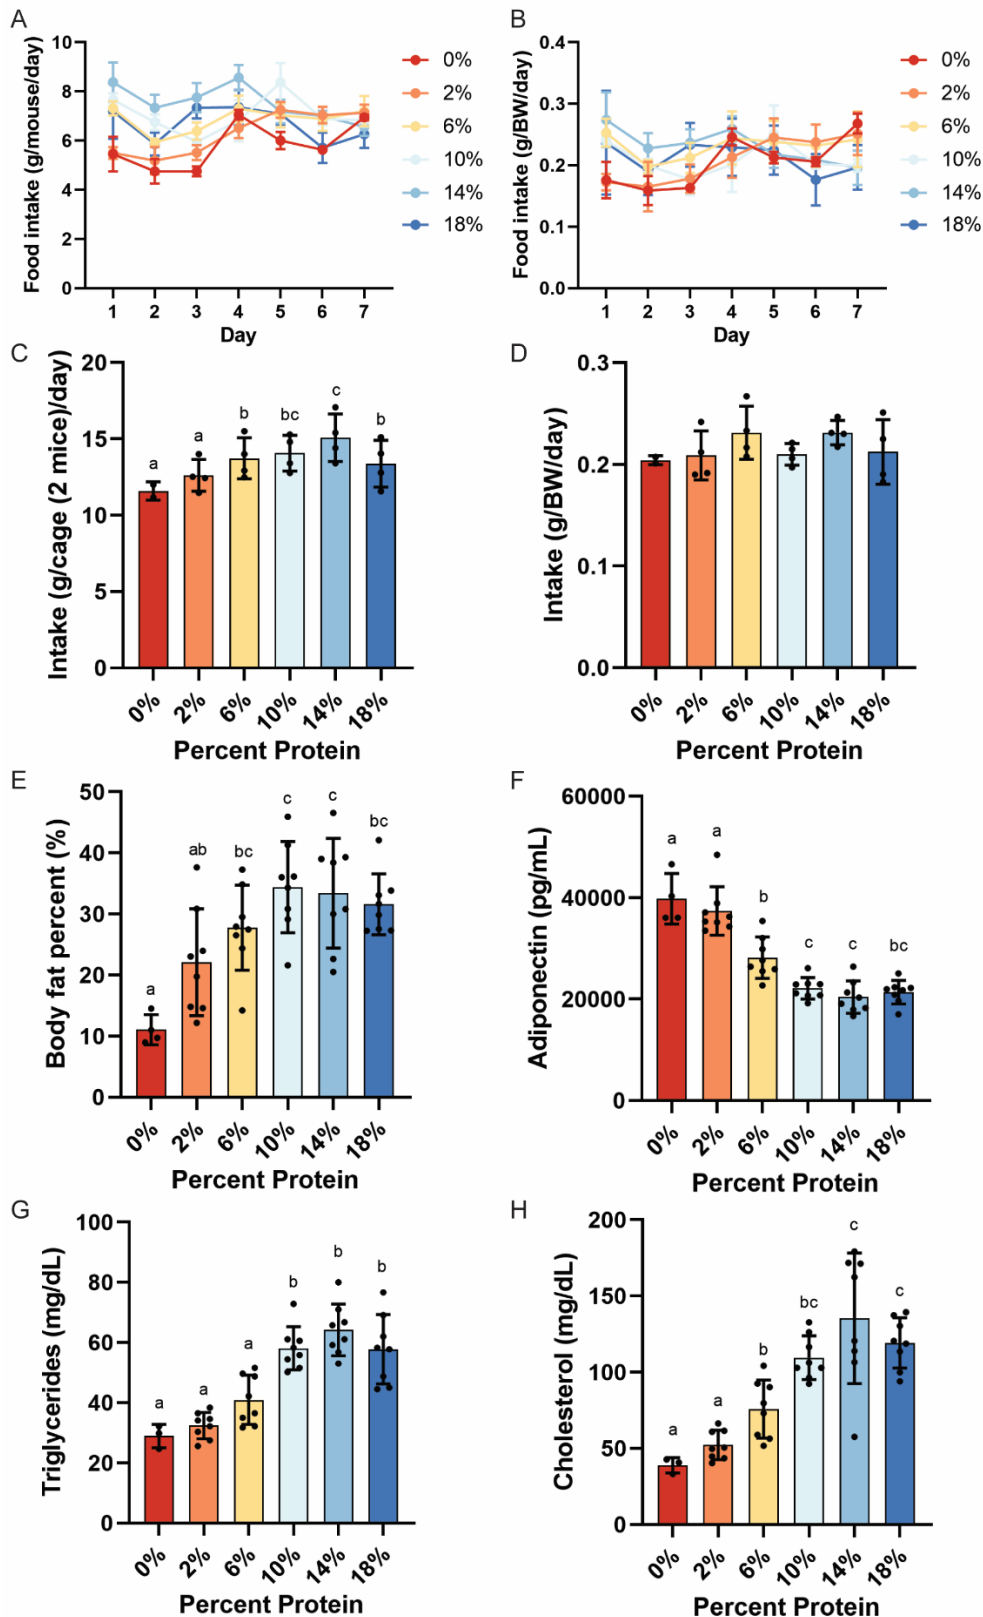

**Figure S1. Phenotypic effects of dietary amino acid titration, related to Figure 1.** Adult male B6D2F1 mice (4/group) were fed ad libitum for one week on an isocaloric semi-purified diet of the indicated protein calorie percentage. (A-D) Food intake per day (A,B) or daily average (C,D) expressed as gram/mouse (A,C) or corrected for body weight (B,D). (E) Percent body fat after one week on the indicated diet. (F-H) Values from blood serum of fasted mice after one week on the indicated diet of adiponectin (F), triglyceride (G) and cholesterol (H). Error bars are standard deviations, different letters indicate  $p < 0.05$  in Tukey post-hoc test. Related to Figure 1.

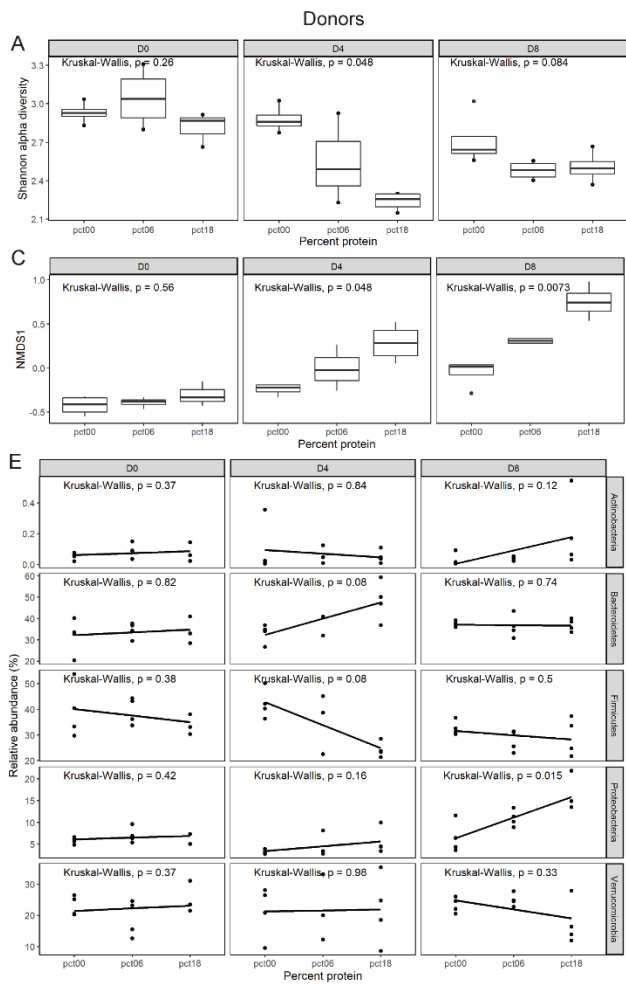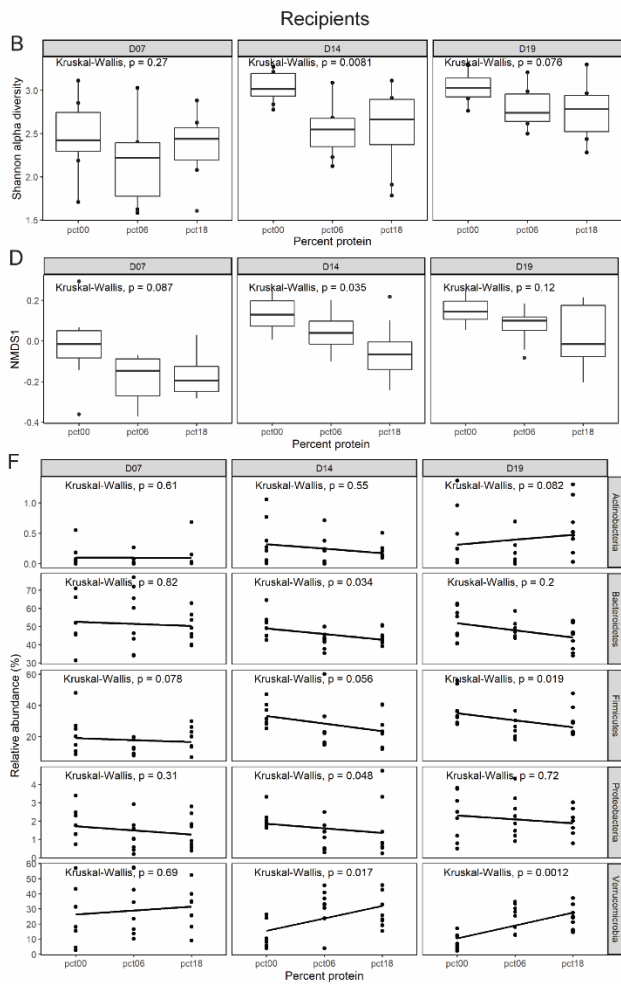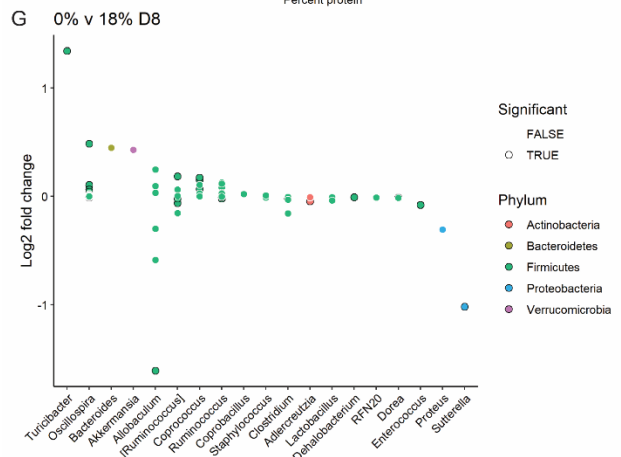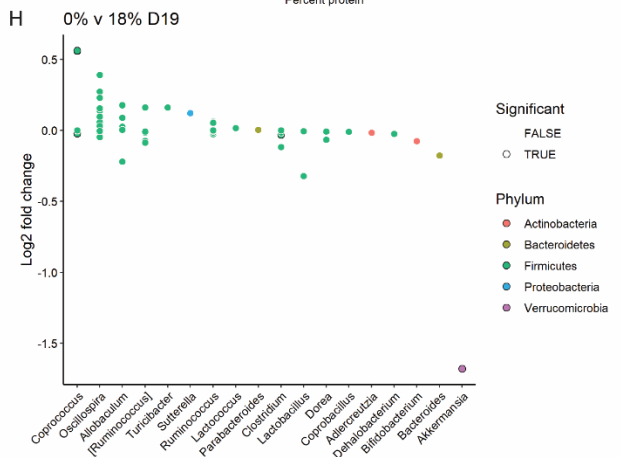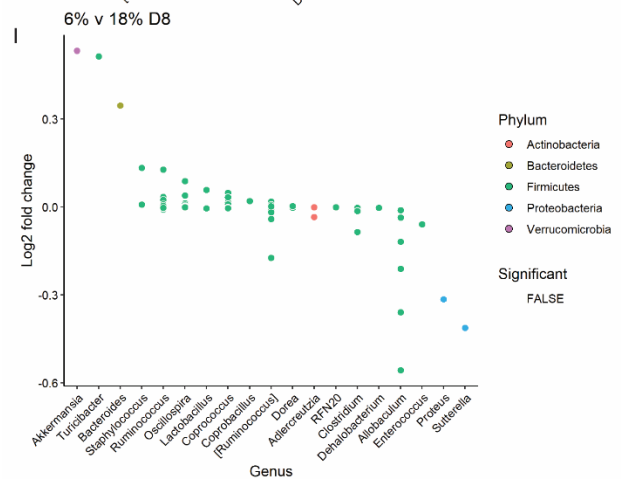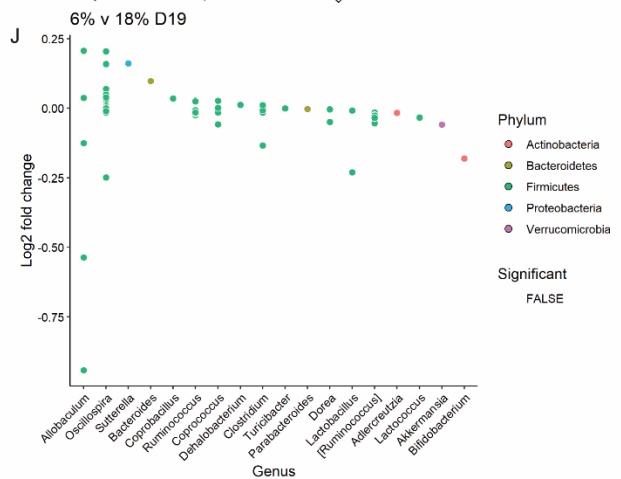

**Figure S2: Dietary protein titration alters fecal microbiome composition, related to Figure 2.**

**A)** Shannon alpha-diversity in fecal samples of donor mice after 0, 4 and 8 days of diet and **(B)** in recipient mice 7, 14 and 19 days after inoculation. **C)** NMDS1 in donor mice after 0, 4 and 8 days of diet and **(D)** in recipient mice 7,14 and 19 days after inoculation. **E)** relative abundances of the 5 major phyla present in fecal samples from donor mice and **(F)** recipient mice across the timecourses. **G)** Differential abundance analysis of species in the 0% vs 18% protein donor mice after 8 days of diet and **(H)** in recipient mice after 19 days of diet. **I)** Differential abundance analysis of species in the 6% vs 18% protein donor mice after 8 days of diet and **(J)** in recipient mice after 19 days of diet. Colors represent phyla. Species which are significantly differentially abundant (FDR adjusted  $p < 0.05$ ) are outlined with a black circle.



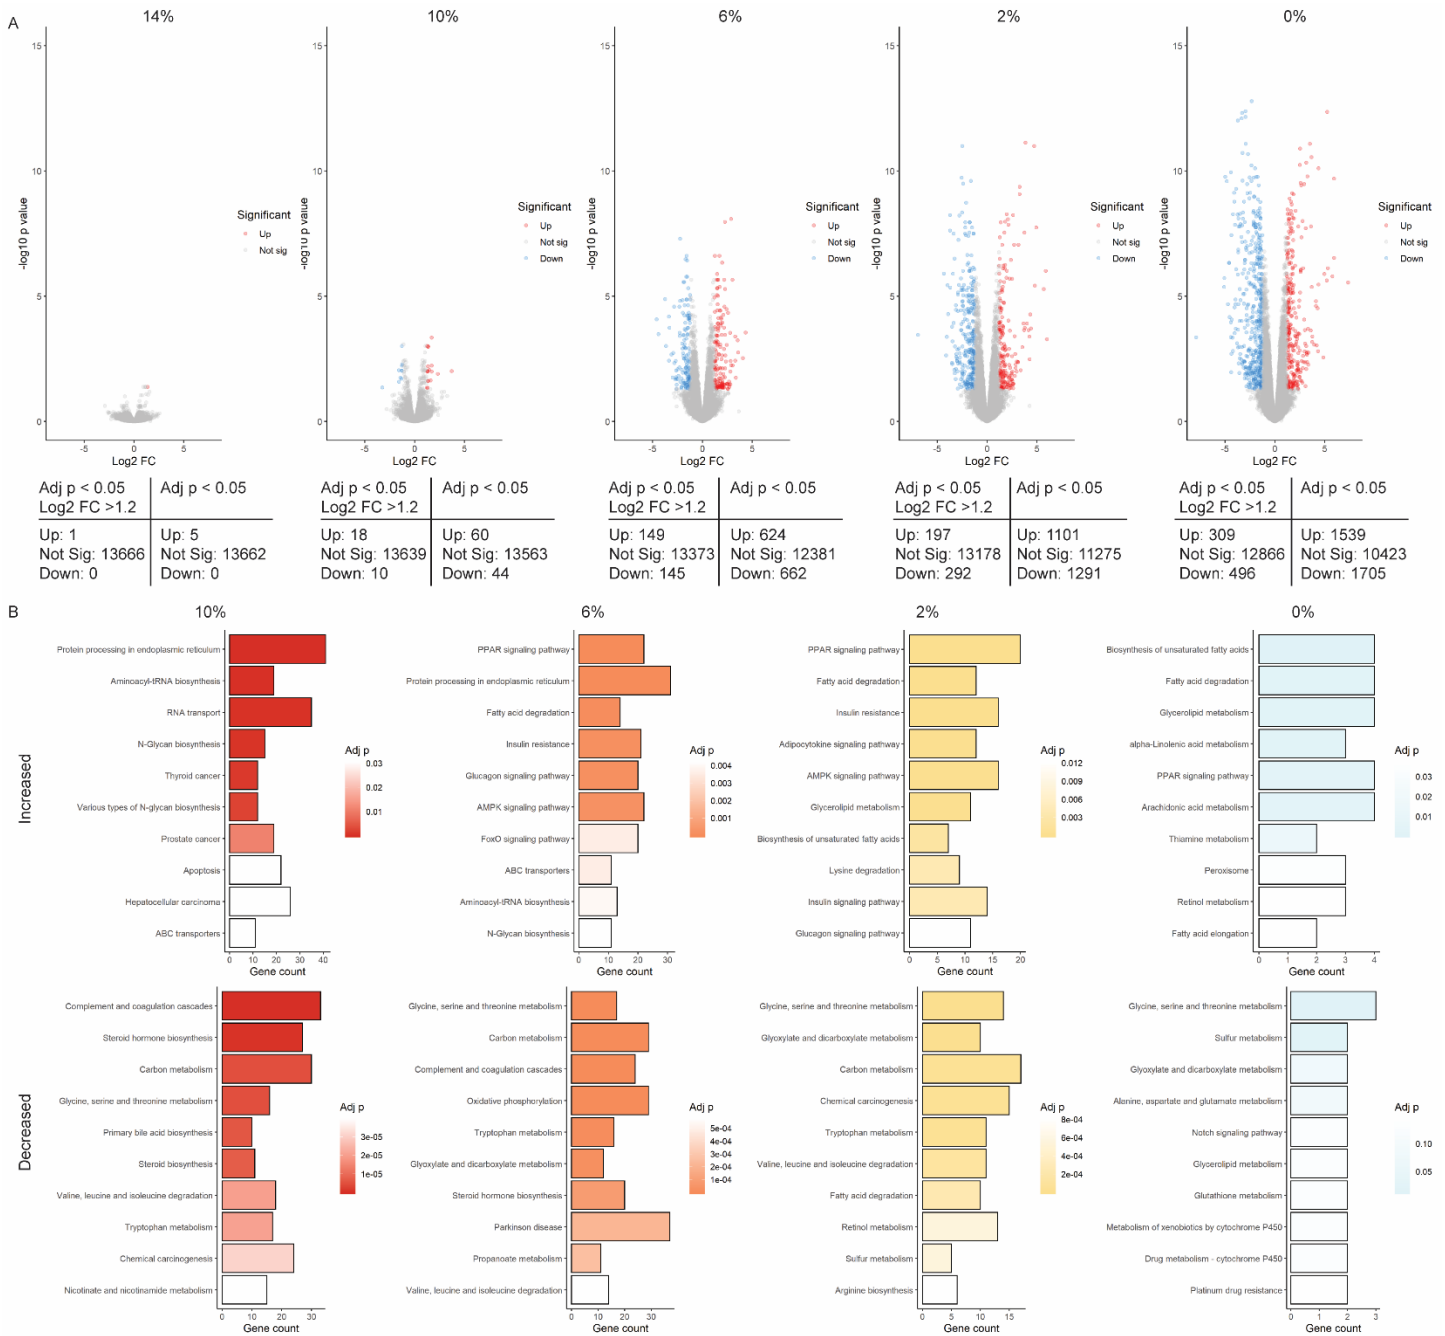

**Figure S3: Effects of dietary protein titration on hepatic transcriptome, related to Figure 3. A)** Differentially expressed genes in the indicated diet group compared to 18% protein intake. **B)** Pathway enrichment in significantly up and downregulated gene sets at the indicated dietary protein level versus 18% protein control group.

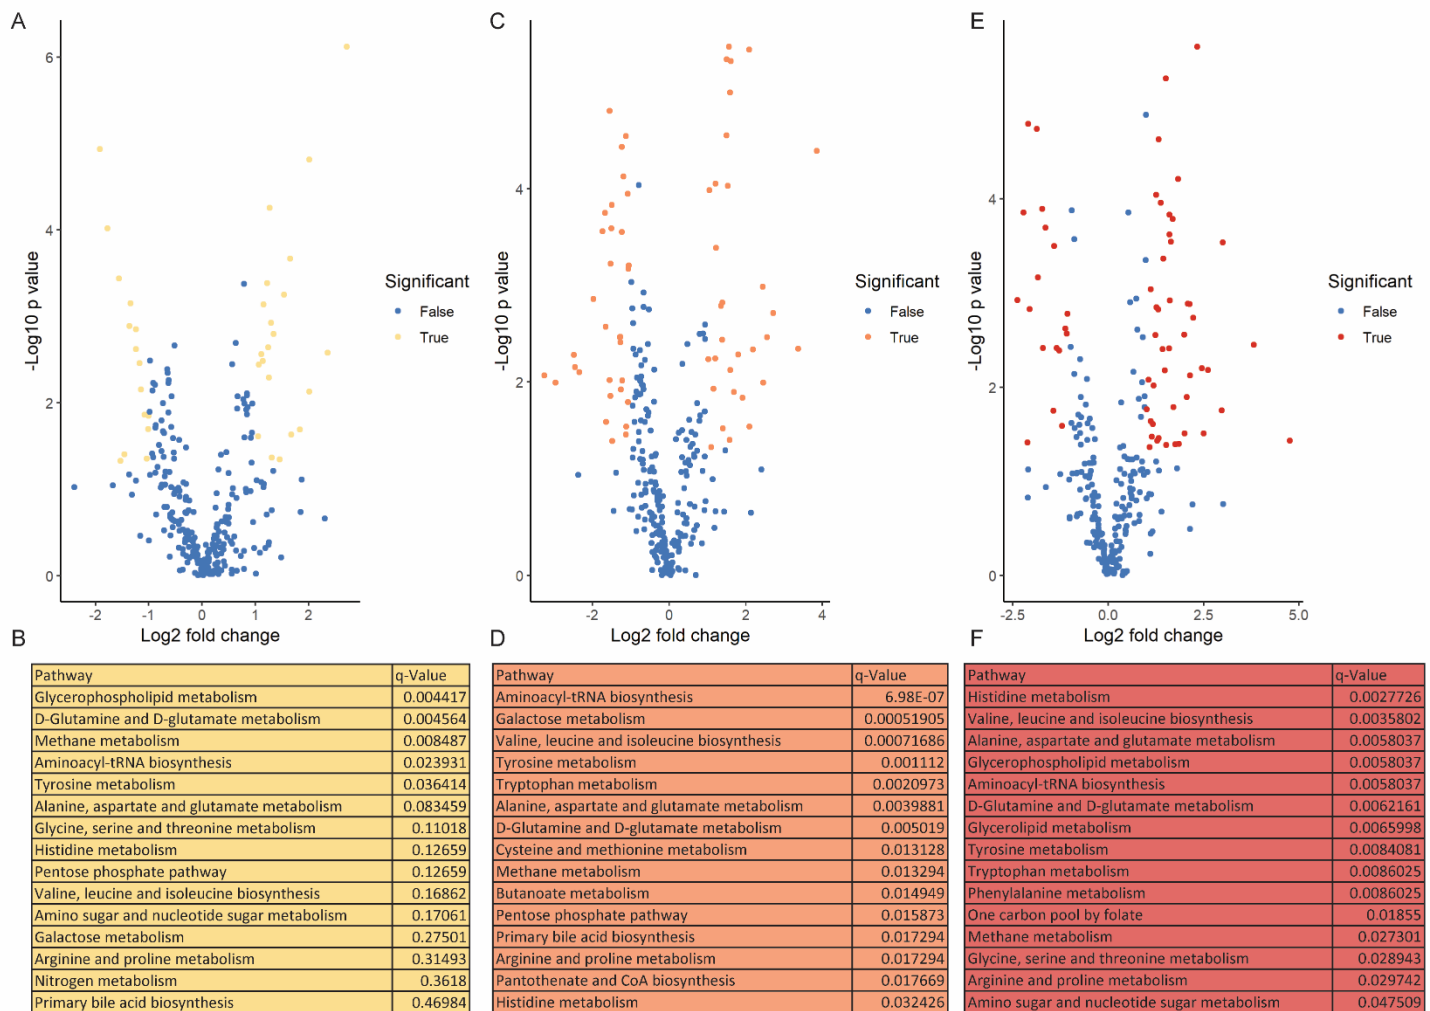

**Figure S4: Effects of dietary protein titration on hepatic metabolome, related to Figure 4.** Changes in individual metabolites (**A,C,E**) and associated pathway enrichment analysis (**B,D,F**) in the 6% (**A,B**), 2% (**C,D**) and 0% (**E,F**) protein vs. 18% protein control group.

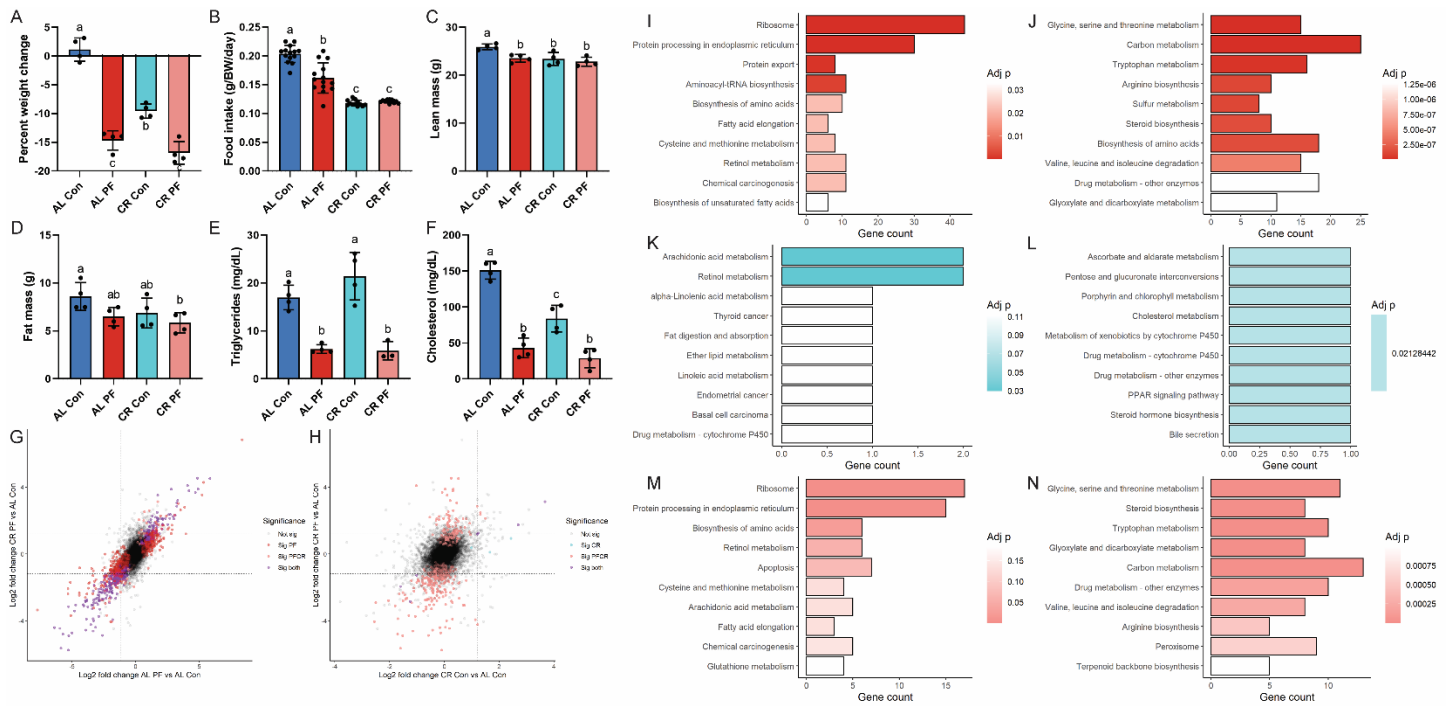

**Figure S5: Phenotypic effects of dietary protein and calorie restriction, related to Figure 5.** Adult male B6D2F1 mice ( $n=4/\text{group}$ ) were fed ad libitum (AL) or 40% calorie restricted (CR) on a control 18% protein (Con) or 0% protein free (PF) diet for one week. **A)** Body weight change expressed as percent starting weight. **B)** Average daily food intake expressed as gram food intake per gram of mouse body weight. **C-F)** Lean body mass (**C**), fat mass (**D**), serum triglycerides (**E**) and serum cholesterol (**F**) in the fasted state after one week on the indicated diet. **G-H)** Scatterplots of log<sub>2</sub> fold changes of hepatic transcripts for AL PF and CR PF vs AL Con,  $r = 0.76$ ,  $p < 0.001$  and for CR Con and CR PF vs AL Con,  $r = 0.36$ ,  $p < 0.001$ . **I-N)** Pathway enrichment in upregulated (left) and downregulated (right) gene sets of protein restriction (AL PF vs. AL Con, **I**); 40% calorie restriction on a control diet (AL Con vs. CR Con, **J**); and 40% calorie restriction on a protein free diet (AL PF vs. CR PF, **K**); different letters indicate  $p < 0.05$  in Tukey post-hoc test. Error bars are standard deviations.
